# Supplementary material for: A circular RNAcirc_0000115in response to graphene oxide in nematodes
Source: Royal Society of Chemistry journal article supplement (doi:10.1039/c9ra00997c), 2019-01-01
Supplement: c9ra00997c1.pdf [file c9ra00997c1.pdf]

**Supporting Information:**

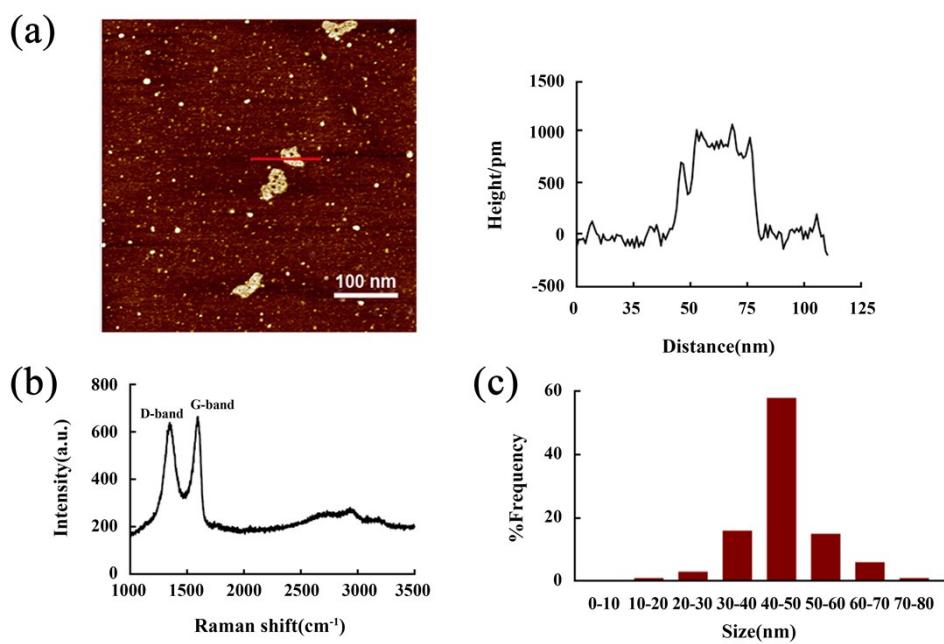

**Fig. S1.** Physicochemical characterization of GO. (a) AFM analysis of GO after sonification. (b) Raman spectrum of GO. (c) Size distribution of GO after sonication.

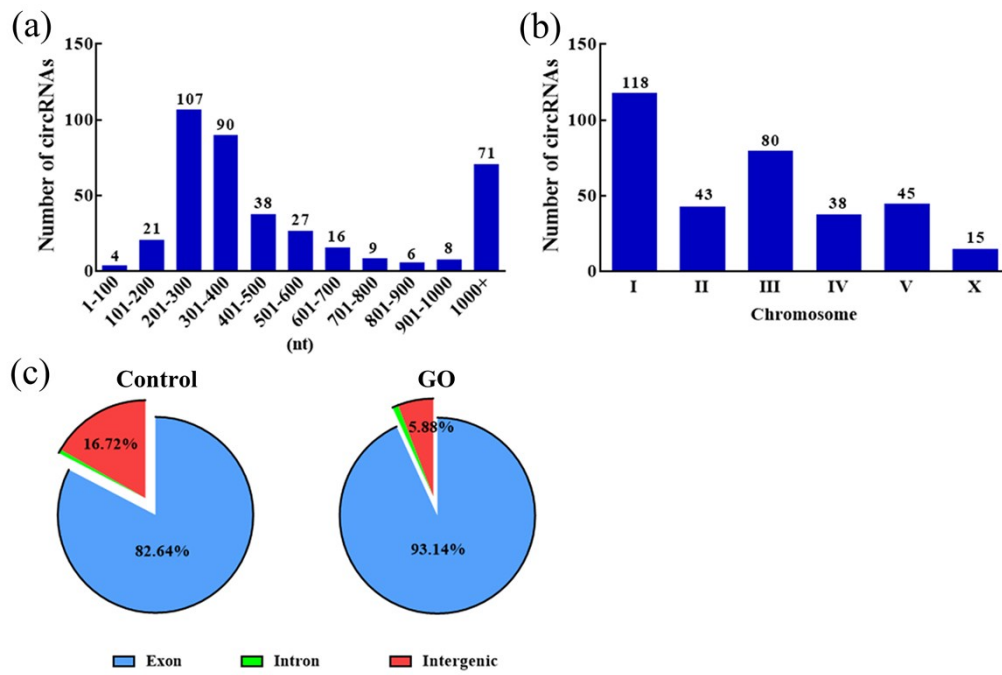

**Fig. S2.** Transcriptome-wide sequencing of circRNAs. (a) Length distribution for circRNAs. (b) Chromosome distribution of circRNAs. (c) Genome region distribution of circRNAs.

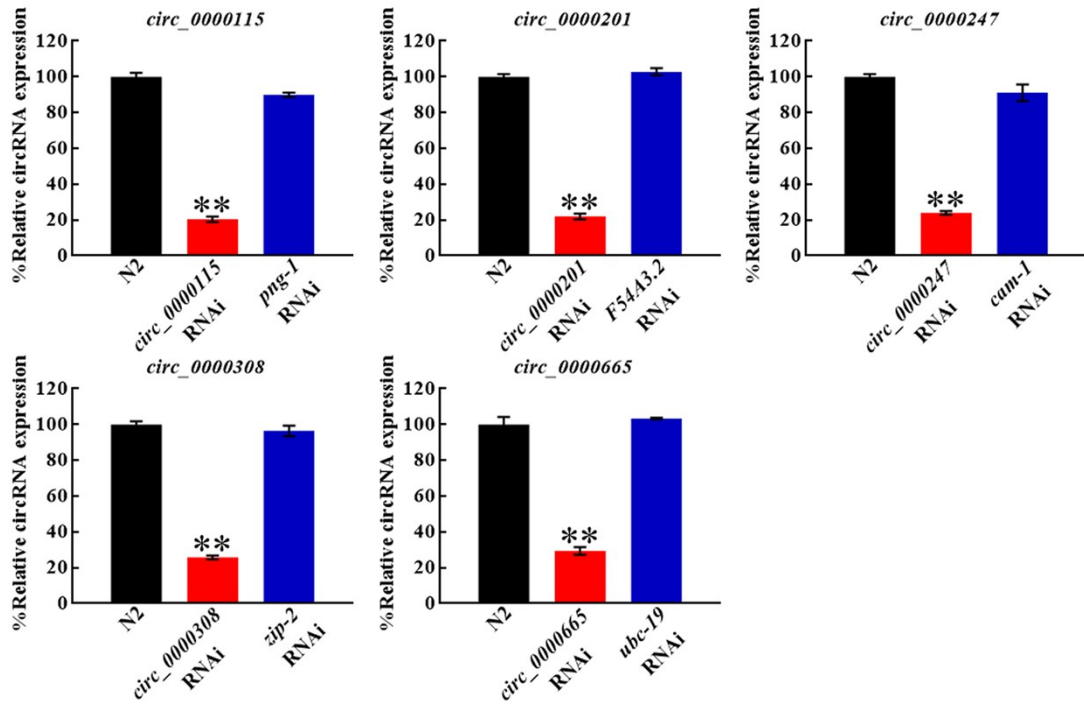

**Fig. S3.** RNAi efficiency confirmation of five circRNAs (*circ\_0000115*, *circ\_0000201*, *circ\_0000247*, *circ\_0000308* and *circ\_0000665*). Bars represent means  $\pm$  SD. \*\* $p < 0.01$  vs wild-type N2.

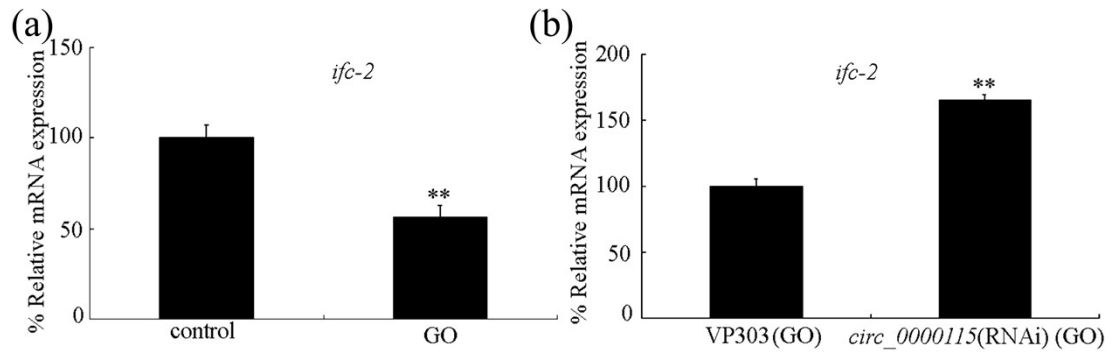

**Fig. S4.** IFC-2 expression in GO exposed nematodes. (a) Effect of GO exposure on *ifc-2* expression. (b) Effect of *circ\_0000115* RNAi knockdown on *ifc-2* expression in GO exposed wild-type nematodes. GO concentration is 100  $\mu\text{g L}^{-1}$ . Prolonged exposure to GO was performed from L1-larvae to adult day-1. Bars represent means  $\pm$  SD. \*\* $p < 0.01$  vs control or VP303(GO).

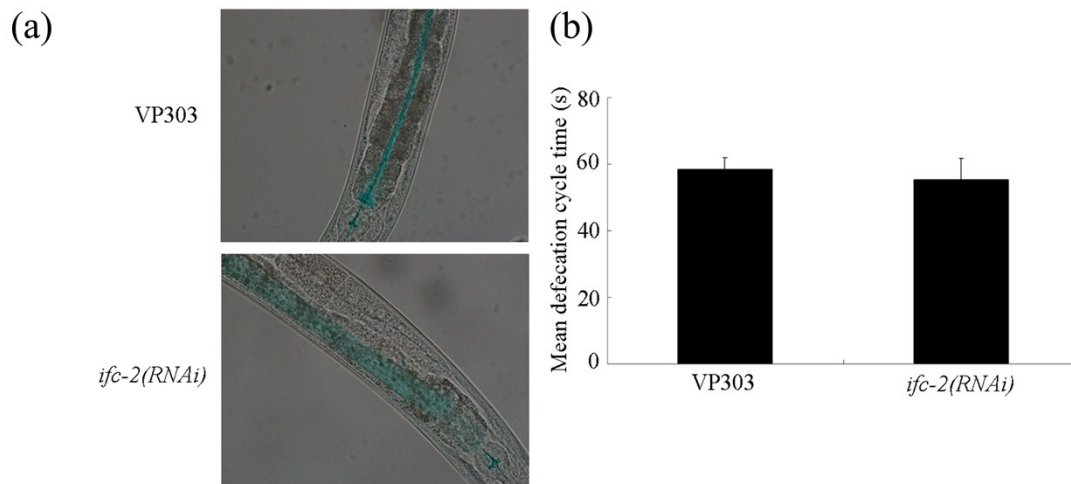

**Fig. S5.** Effect of intestine-specific RNAi knockdown of *ifc-2* on intestinal permeability and defecation behavior. (a) Effect of intestine-specific RNAi knockdown of *ifc-2* on intestinal permeability and defecation behavior. The nematodes were suspended in blue food dye (eriolgaucine disodium, 5.0% wt/vol) for 3 h, and then analyzed the distribution of blue food dye in the body using a microscope. Twenty nematodes were examined per treatment. The blue dye was distributed in the intestinal lumen of both VP303 and *ifc-2(RNAi)* nematodes. (b) Effect of intestine-specific RNAi knockdown of *ifc-2* on mean defecation cycle length. Individual animal was examined for a fixed number of cycles, and a cycle period was defined as the interval between the initiations of two successive posterior body-wall muscle contraction steps. Thirty replicates were performed. Bars represent means  $\pm$  SD.

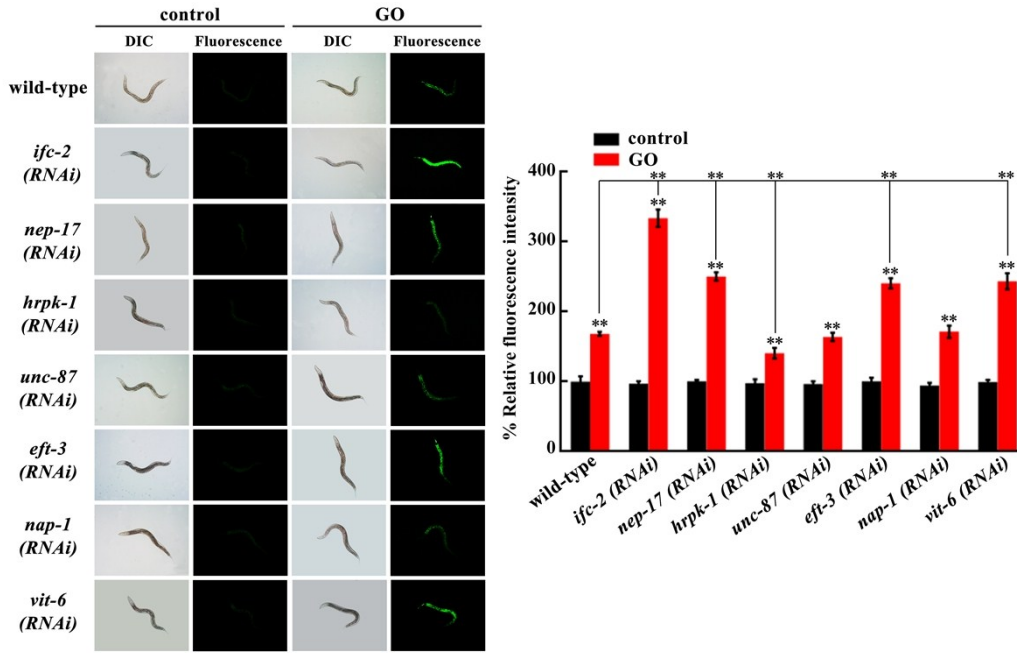

**Fig. S6.** Effect of RNAi knockdown of seven genes on GO toxicity in inducing ROS production. GO concentration is 100  $\mu\text{g L}^{-1}$ . Prolonged exposure to GO was performed from L1-larvae to adult day-1. Bars represent means  $\pm$  SD. \*\* $p < 0.01$  vs control (if not specially indicated).

**Table S1.** Primer information for qRT-PCR of circRNAs

| <b>Gene</b>         | <b>Forward primer (5'-3')</b> | <b>Reverse primer (5'-3')</b> | <b>Primer type</b> |
|---------------------|-------------------------------|-------------------------------|--------------------|
| <i>circ_0000032</i> | TTAAGCTGGCTGCTCCAAG           | ATCCATTGAGGAGAGGGGG           | Divergent Primer   |
| <i>circ_0000035</i> | TGGAAAGAGTGTGGCTGAC           | CGGCATTGCAGTTGAACTTG          | Divergent Primer   |
| <i>circ_0000097</i> | AACGAAACCAGCTACTTCAACA        | AGAATCGCTTTGAGAACGTTTC        | Divergent Primer   |
| <i>circ_0000107</i> | TGATCTACAAACTGGAAAACCC        | GCCGATTTTCAGATTTTCCAGT        | Divergent Primer   |
| <i>circ_0000115</i> | GTGGATGGGGAAAGACACTG          | ATTAAGAGCGGCAAGCAGAA          | Divergent Primer   |
| <i>circ_0000119</i> | ACAAAGGCTGCGCATTCTC           | CCAAATTGCTCAAATAGGTG          | Divergent Primer   |
| <i>circ_0000132</i> | GCTAAATTCTGTGCGATACCAA        | TTTCGAATGTTTTCAACGCC          | Divergent Primer   |
| <i>circ_0000155</i> | CACCGTGTACCTACAGCCTTCA        | GTTTTACTTGGCGCATTC            | Divergent Primer   |
| <i>circ_0000160</i> | GCGTATTGTGGATCCTTATGGC        | CAAACGACGCGTAGAAATGGAC        | Divergent Primer   |
| <i>circ_0000201</i> | TTTACGCATATTTCTGCCGC          | GGAAGTTGTCGTATCAGCCA          | Divergent Primer   |
| <i>circ_0000247</i> | TTGTCTCAAATCCAGCAGCC          | TCGCACTTAAACCGAACCTC          | Divergent Primer   |
| <i>circ_0000281</i> | ATTACACGACGACGACCTTG          | AATCGATGCTCCGAACGAAA          | Divergent Primer   |
| <i>circ_0000304</i> | GAACTTCTCGACCGTGGATT          | TACTTGGACCATCCGTCTCG          | Divergent Primer   |
| <i>circ_0000308</i> | CATCTCTGACGCCTACATTCA         | TCTTTGCGTGATACATTGTGG         | Divergent Primer   |
| <i>circ_0000311</i> | GGGACGCCGTCACAGATTAA          | GCAGCACATAAACCACTCGAT         | Divergent Primer   |
| <i>circ_0000313</i> | GCCGACTGGATTCGAGACAA          | GCTGAATCGCTTCGAGACCT          | Divergent Primer   |
| <i>circ_0000315</i> | GCTGTTCGAGTGGTGTGAC           | TGAGTCGGCTCCAATCTCAT          | Divergent Primer   |
| <i>circ_0000329</i> | GAATTGCCGACACCATCAGT          | GATTTCCCGCTCCTCACAAG          | Divergent Primer   |
| <i>circ_0000333</i> | ACGCAGAGATTACAGTCGGA          | TGATTTTCACGTTTCGGGGT          | Divergent Primer   |
| <i>circ_0000342</i> | ATTCCACGTCGAATTTCTCTC         | GACCACCTTGAACCCAACAA          | Divergent Primer   |
| <i>circ_0000352</i> | CGTCGCTAAGCAAGTCTGAA          | CTGGTTTCTGTGATCGGGTG          | Divergent Primer   |
| <i>circ_0000356</i> | TTCGCTTTTTCGTTGGGAAT          | GGTCGAGAATTTGGGATTGT          | Divergent Primer   |
| <i>circ_0000363</i> | CCACATTCGTCATTCTTGCC          | ATAGGTGAGCCAGTTGGTGA          | Divergent Primer   |
| <i>circ_0000364</i> | GGAATGTTTGACGGGGTTGA          | CGTGGATTTCGACAGGGTTAC         | Divergent Primer   |
| <i>circ_0000451</i> | CGACATCATAAATACTTTGCCG        | TTTCCAATCGGCTGCATTTT          | Divergent Primer   |
| <i>circ_0000488</i> | GTGTGGTAACATGCGTTCCGG         | AACACTTGCAACCCATGACA          | Divergent Primer   |
| <i>circ_0000558</i> | CCACAACACTGGAACAACAAC         | AGTCCTTCCGATCCCATCAG          | Divergent Primer   |

|                     |                        |                        |                   |
|---------------------|------------------------|------------------------|-------------------|
| <i>circ_0000603</i> | GCCGAGACTAGACTTTGAGC   | CCGGCTGAAATCCGTGATAC   | Divergent Primer  |
| <i>circ_0000653</i> | AGCAATTAATGGTTATGCGGAG | ATTCGGCGGCTTTCAGTAGA   | Divergent Primer  |
| <i>circ_0000665</i> | AAAAGCATAGCCTGAGACGG   | TCCAGCGGAATGTGAATGTT   | Divergent Primer  |
| <i>circ_0000672</i> | TTGAAAAGTGGCACGGATACA  | GTGCATCCATTCTAGCCAA    | Divergent Primer  |
| <i>circ_0000699</i> | CTGCTGGCAGAGTTGAAAGA   | GCTCATTTTCGGAGACTTCTGC | Divergent Primer  |
| <i>circ_0000713</i> | TCGATGAAGTGTGCGTGAG    | TCCCTACGTGGATTCATGGTT  | Divergent Primer  |
| <i>circ_0000115</i> | AATTGTTTCGGGCTTCTGC    | CGGTCGATCCATAGTATTTTCA | Convergent Primer |
| <i>tba-1</i>        | TCAACACTGCCATCGCCGCC   | TCCAAGCGAGACCAGGCTTCAG | Convergent Primer |

---



**Table S2.** Primer information for RNAi of certain circRNA or gene

| Gene                        | Forward primer (5'-3')            | Reverse primer (5'-3')         | Restriction enzyme site |
|-----------------------------|-----------------------------------|--------------------------------|-------------------------|
| <i>circ_0000115</i><br>RNAi | CAGTCTAGAGATCATGTGGTTG<br>ACG     | GTCAAGCTTGAAACAATTGGCC<br>CA   | XbaI/HindIII            |
| <i>circ_0000201</i><br>RNAi | GCACTGCAGATCCAATTTATTA<br>AGAC    | ATCAAGCTTCGTTCTTCTTCTTA<br>TCC | PstI/HindIII            |
| <i>circ_0000247</i><br>RNAi | TATCCATGGTTGTCTCAAATCC<br>AGCA    | ATAAAGCTTCGGTCGTTGACCA<br>GTT  | NcoI/HindIII            |
| <i>circ_0000308</i><br>RNAi | CTGCCATGGAGTTCTTTCCACA<br>GCT     | CGCCTGCAGCGAAATCTAGTGA<br>CAA  | NcoI/PstI               |
| <i>circ_0000665</i><br>RNAi | ACGCCATGGAAAGGAAAAGCA<br>TAGCC    | ACTCTGCAGCGCCAAAAATCCC<br>TTT  | NcoI/PstI               |
| <i>png-1 RNAi</i>           | ATATCTAGAACATTGTCCAGCG<br>GT      | TATAAGCTTGAGCCTTGAACAC<br>CT   | XbaI/HindIII            |
| <i>F54A3.2 RNAi</i>         | ATACCATGGGCTCTAAACACTC<br>AA      | TAGCTGCAGTTCCAATAAATCC<br>AG   | NcoI/PstI               |
| <i>cam-1 RNAi</i>           | GCGTCTAGAATGATGGATCGTG<br>GA      | ATACCATGGGTTGCCGACACTT<br>TT   | XbaI/NcoI               |
| <i>zip-2 RNAi</i>           | ATACCATGGGGAAAATCCACGT<br>CATCG   | ATGCTGCAGTGTAGTCCTCGAC<br>TTG  | NcoI/PstI               |
| <i>ubc-19 RNAi</i>          | TACTCTAGATGGACACCGACAA<br>GTGCA   | AGTCCATGGGGTGATCACAGTC<br>ATC  | XbaI/NcoI               |
| <i>ifc-2 RNAi</i>           | CGATCTAGAAGCAAACAACCG<br>CTCACCG  | ATACCATGGACGGAGGGTCGCA<br>ATCT | XbaI/NcoI               |
| <i>nep-17 RNAi</i>          | ATACTGCAGCCAAAACCTCCAT<br>CCG     | ATAGGTACCTTGCATAGGCCTT<br>CTG  | PstI/KpnI               |
| <i>hrpk-1 RNAi</i>          | GAGTCTAGATTCCCTTCAGTTC<br>CGTG    | ATACCATGGGATCCACCGAATC<br>GTTC | XbaI/NcoI               |
| <i>unc-87 RNAi</i>          | AGATCTAGAATCATCAATTGGA<br>CCACCAC | ATACTGCAGTTGGTTGCTCCTG<br>ATT  | XbaI/PstI               |
| <i>eft-3 RNAi</i>           | CGATCTAGATGGAGTCAAGCA<br>ACTC     | ATACTGCAGTTCTTCTTTGGTGC<br>AGC | XbaI/PstI               |
| <i>nap-1 RNAi</i>           | TGATCTAGATCAGGCTTTGCCT<br>CTC     | ATAGGTACCCTGACACATCATC<br>ACC  | XbaI/KpnI               |
| <i>vit-6 RNAi</i>           | CGACCATGGCAATCAATGTTGA<br>ACC     | ATAGGTACCCTCCTCCATTTGT<br>GGT  | NcoI/KpnI               |

**Table S3.** Primer information for vector construction

|                    | <b>Forward primer (5'-3')</b>     | <b>Reverse primer (5'-3')</b>   | <b>Restriction enzyme site</b> |
|--------------------|-----------------------------------|---------------------------------|--------------------------------|
| <i>Pges-1</i>      | ATATCTAGAAGCCACTCAGCCA<br>CTTCA   | ATAGGATCCCATCTGAATTCAA<br>AGATA | XbaI/BamHI                     |
| <i>ifc-2/M6.1d</i> | ATAGGATCCATGTTCGACTTACG<br>CGGCCT | TAACCCGGGGTCAAGGTAGACA<br>AACCA | BamHI/SmaI                     |

**Table S4.** Information for dysregulated known circRNAs

| CircRNA ID          | CircRN |        | Chromosome location      | Gene ID        | Gene               | logFC     |
|---------------------|--------|--------|--------------------------|----------------|--------------------|-----------|
|                     |        | A type |                          |                |                    |           |
| <i>circ_0000032</i> | exon   |        | I :1817301:1817613       | WBGene00022142 | <i>Y71G12B.2</i>   | -7.451958 |
| <i>circ_0000304</i> | exon   |        | III:730585:731798        | WBGene00003936 | <i>gei-16</i>      | -7.039664 |
| <i>circ_0000035</i> | exon   |        | I :1999954:2001195       | WBGene00021238 | <i>Y51F10.9</i>    | -6.558617 |
| <i>circ_0000247</i> | exon   |        | II :9304008:9304745      | WBGene00000289 | <i>cam-1</i>       | -6.354519 |
| <i>circ_0000097</i> | exon   |        | I :9548218:9548654       | WBGene00007985 | <i>C36F7.2</i>     | -6.116712 |
| <i>circ_0000558</i> | exon   |        | IV:11722489:1172305<br>5 | WBGene00010444 | <i>magi-1</i>      | -6.110452 |
| <i>circ_0000315</i> | exon   |        | III:1187295:1187741      | WBGene00022491 | <i>Y119D3B.14</i>  | -5.981286 |
| <i>circ_0000313</i> | exon   |        | III:1074167:1076543      | WBGene00006697 | <i>Y92C3B.2a.1</i> | -5.834821 |
| <i>circ_0000311</i> | exon   |        | III:987238:987508        | WBGene00019915 | <i>tbc-10</i>      | -5.831819 |
| <i>circ_0000160</i> | exon   |        | I:14427055:14428997      | WBGene00013670 | <i>Y105E8A.10</i>  | -5.831819 |
| <i>circ_0000653</i> | exon   |        | V:18065061:1806546<br>3  | WBGene00013345 | <i>Y59A8B.8</i>    | -5.831801 |
| <i>circ_0000713</i> | exon   |        | X:9510459:9511097        | WBGene00001516 | <i>gap-2</i>       | -5.733819 |
| <i>circ_0000132</i> | exon   |        | I :12878627:1287958<br>2 | WBGene00003905 | <i>pad-1</i>       | -5.476467 |
| <i>circ_0000342</i> | exon   |        | III:2140079:2140320      | WBGene00021698 | <i>fri-1</i>       | -5.466567 |
| <i>circ_0000356</i> | exon   |        | III:3088300:3088575      | WBGene00004787 | <i>sft-1</i>       | -5.446967 |
| <i>circ_0000488</i> | exon   |        | IV:2229794:2230105       | WBGene00020208 | <i>T04C4.1</i>     | -5.476467 |
| <i>circ_0000107</i> | exon   |        | I :10977642:1097804<br>9 | WBGene00013123 | <i>Y52B11A.3</i>   | -5.259465 |
| <i>circ_0000119</i> | exon   |        | I :11593916:1159429<br>4 | WBGene00006807 | <i>unc-75</i>      | -5.239265 |
| <i>circ_0000155</i> | exon   |        | I :13944636:1394639<br>1 | WBGene00013506 | <i>usp-3</i>       | -5.229495 |
| <i>circ_0000451</i> | exon   |        | III:12631806:1263480     | WBGene00004161 | <i>Y111B2A.14.</i> | -5.219665 |

|                     |      |                     |                |                  |           |
|---------------------|------|---------------------|----------------|------------------|-----------|
|                     |      | 9                   |                | 2                |           |
| <i>circ_0000352</i> | exon | III:2482724:2483108 | WBGene00004884 | <i>smg-6</i>     | -2.795358 |
| <i>circ_0000364</i> | exon | III:3299365:3299857 | WBGene00021812 | <i>Y53G8AR.5</i> | -2.775752 |
| <i>circ_0000281</i> | exon | II:14870599:1487100 | WBGene00011044 | <i>R05H10.3</i>  | -2.739129 |
|                     |      | 6                   |                |                  |           |
| <i>circ_0000672</i> | exon | V:18956093:1895642  | WBGene00013587 | <i>Y80D3A.9</i>  | -2.253039 |
|                     |      | 3                   |                |                  |           |
| <i>circ_0000665</i> | exon | V:18688227:1868846  | WBGene00006714 | <i>ubc-19</i>    | -2.174839 |
|                     |      | 9                   |                |                  |           |
| <i>circ_0000329</i> | exon | III:1675421:1675681 | WBGene00021260 | <i>Y22D7AR.6</i> | -2.124374 |
| <i>circ_0000201</i> | exon | II:2246478:2246959  | WBGene00018781 | <i>F54A3.2</i>   | -2.031746 |
| <i>circ_0000603</i> | exon | V:4571714:4572374   | WBGene00022015 | <i>Y61A9LA.3</i> | -1.837405 |
| <i>circ_0000115</i> | exon | I:11384076:1138435  | WBGene00010160 | <i>png-1</i>     | -1.796724 |
|                     |      | 6                   |                |                  |           |
| <i>circ_0000333</i> | exon | III:1927665:1927938 | WBGene00004128 | <i>F53A3.6</i>   | -1.196125 |
| <i>circ_0000363</i> | exon | III:3113760:3114033 | WBGene00021820 | <i>nipa-1</i>    | -1.14193  |
| <i>circ_0000699</i> | exon | X:344165:345275     | WBGene00015430 | <i>C04E7.3</i>   | 5.8348208 |
| <i>circ_0000308</i> | exon | III:834296:835205   | WBGene00019327 | <i>zip-2</i>     | 6.0936363 |

---

**Table S5.** Information for dysregulated novel circRNAs

| CircRNA ID           | CircRNA type | Gene ID        | logFC     | New ID<br>(Ivanov 2015) |
|----------------------|--------------|----------------|-----------|-------------------------|
| IV:17278959:17279168 | exon         | WBGene00002005 | -7.568977 |                         |
| X:8718612:8718907    | exon         | WBGene00018731 | -7.379973 |                         |
| II:10013295:10013341 | exon         | WBGene00002265 | -6.650769 |                         |
| I:1670969:1671255    | exon         | WBGene00022158 | -5.981286 | <i>cel_circ_000086</i>  |
| II:11133703:11133837 | exon         | WBGene00009578 | -5.971216 |                         |
| III:2745138:2745409  | exon         | WBGene00022179 | -5.811319 | <i>cel_circ_000101</i>  |
| V:18857769:18858076  | exon         | WBGene00006945 | -5.476467 | <i>cel_circ_000077</i>  |
| I:1674941:1675386    | exon         | WBGene00185098 | 5.519198  | <i>cel_circ_000121</i>  |
| I:3142042:3142265    | exon         | WBGene00019597 | 5.509298  | <i>cel_circ_000142</i>  |
| IV:11275681:11276616 | exon         | WBGene00001796 | 5.501128  | <i>cel_circ_000078</i>  |

**Table S6.** Information for mass spectrometry result (top 15 proteins)

| No | Score | Name                   | Gene          | Peptides (95%) |
|----|-------|------------------------|---------------|----------------|
| 1  | 49.15 | tr Q6LD30 Q6LD30_CAEEL | <i>unc-87</i> | 47             |
| 2  | 45.08 | tr G8JY94 G8JY94_CAEEL | <i>ifc-2</i>  | 23             |
| 3  | 38.61 | sp P98080 UCR1_CAEEL   | <i>ucr-1</i>  | 21             |
| 4  | 30.46 | sp P53013 EF1A_CAEEL   | <i>eft-3</i>  | 16             |
| 5  | 26.34 | tr Q23050 Q23050_CAEEL | <i>clik-1</i> | 17             |
| 6  | 25.79 | tr M1Z854 M1Z854_CAEEL | <i>ifb-2</i>  | 14             |
| 7  | 22.56 | tr H2KYS1 H2KYS1_CAEEL | <i>hsp-43</i> | 16             |
| 8  | 22.12 | tr Q19007 Q19007_CAEEL | <i>nap-1</i>  | 11             |
| 9  | 19.89 | tr Q9XW17 Q9XW17_CAEEL | <i>car-1</i>  | 10             |
| 10 | 19.04 | sp Q19289 IFB1_CAEEL   | <i>ifb-1</i>  | 13             |
| 11 | 18.36 | tr P91277 P91277_CAEEL | <i>hrpk-1</i> | 11             |
| 12 | 18.17 | tr G4SI07 G4SI07_CAEEL | <i>gei-15</i> | 10             |
| 13 | 18.11 | sp P10567 MYSP_CAEEL   | <i>unc-15</i> | 10             |
| 14 | 17.51 | sp P18948 VIT6_CAEEL   | <i>vit-6</i>  | 11             |
| 15 | 16.71 | tr O45569 O45569_CAEEL | <i>nep-17</i> | 10             |

**Table S7.** RPIseq prediction result of *circ\_0000115*-protein binding capacity

| <b>No</b> | <b>Gene name</b> | <b><i>circ_0000115</i>-protein RPIseq</b> |
|-----------|------------------|-------------------------------------------|
| 1         | <i>ifc-2</i>     | 0.8                                       |
| 2         | <i>nep-17</i>    | 0.7                                       |
| 3         | <i>hsp-43</i>    | 0.65                                      |
| 4         | <i>hrpk-1</i>    | 0.65                                      |
| 5         | <i>unc-87</i>    | 0.6                                       |
| 6         | <i>eft-3</i>     | 0.6                                       |
| 7         | <i>clik-1</i>    | 0.55                                      |
| 8         | <i>nap-1</i>     | 0.55                                      |
| 9         | <i>vit-6</i>     | 0.55                                      |
| 10        | <i>car-1</i>     | 0.5                                       |
